# Supplementary material
Source: publisher figshare collection journal article supplement (https://frontiersin.figshare.com/ndownloader/files/25657880)

SI-2: Photographs of the coating used

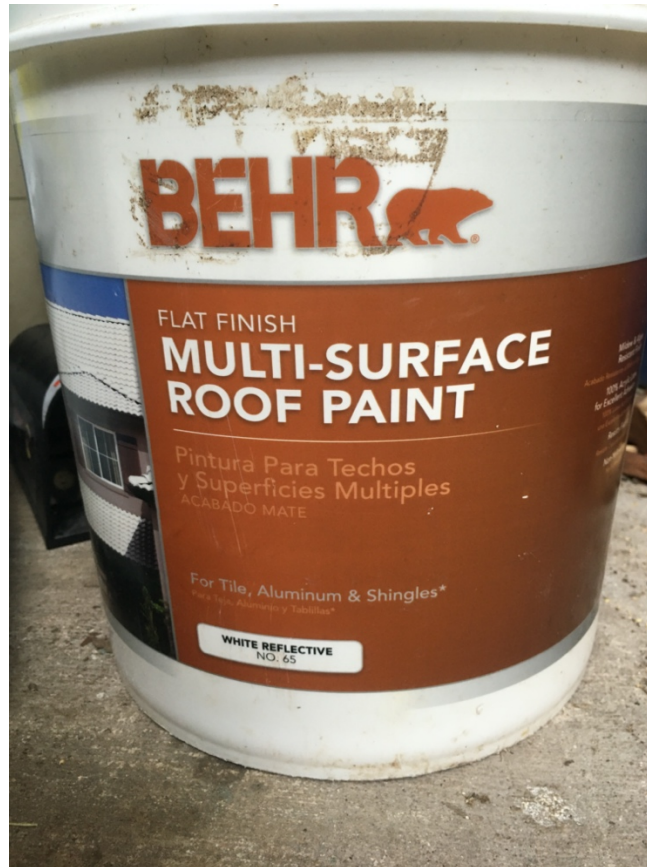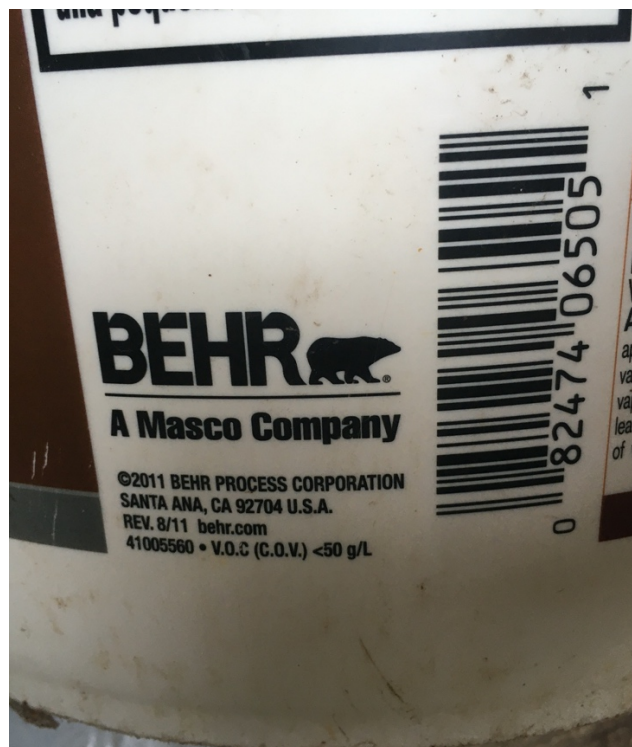

Supplement: Supplementary file 1 [file 25657880]
